# Supplementary material for: Knowledge, Perspectives, and Risks Perceptions on Gene Drive and Genetically Modified Mosquitoes for Malaria Control among African Stakeholders: A Scoping Review Protocol
Source: Research Square preprint supplement (doi:10.21203/rs.3.rs-6048767/v1), 2025-07-09
Supplement: Supplementary file 1 [file 70176960913f1b255fc19cd1.docx]

**Appendixes**

Appendix #1: Adapted PRISMA-Scr Checklist for Scoping review protocol

**Preferred Reporting Items for Systematic reviews and Meta-Analyses extension for Scoping Reviews (PRISMA-ScR) Checklist**

This checklist has been adapted for use for our scoping review protocol submission

| **SECTION** | **ITEM** | **PRISMA-ScR CHECKLIST ITEM** | **REPORTED ON PAGE #** |
| --- | --- | --- | --- |
| **TITLE** | | | |
| Title | 1 | Identify the report as a scoping review. | 1 |
| **ABSTRACT** | | | |
| Structured summary | 2 | Provide a structured summary that includes (as applicable): background, objectives, eligibility criteria, sources of evidence, charting methods, results, and conclusions that relate to the review questions and objectives. | 1 |
| **INTRODUCTION** | | | |
| Rationale | 3 | Describe the rationale for the review in the context of what is already known. Explain why the review questions/objectives lend themselves to a scoping review approach. | 2 |
| Objectives | 4 | Provide an explicit statement of the questions and objectives being addressed with reference to their key elements (e.g., population or participants, concepts, and context) or other relevant key elements used to conceptualize the review questions and/or objectives. | 3 |
| **METHODS** | | | |
| Protocol and registration | 5 | Indicate whether a review protocol exists; state if and where it can be accessed (e.g., a Web address); and if available, provide registration information, including the registration number. | 4 |
| Eligibility criteria | 6 | Specify characteristics of the sources of evidence used as eligibility criteria (e.g., years considered, language, and publication status), and provide a rationale. | 3 |
| Information sources* | 7 | Describe all information sources in the search (e.g., databases with dates of coverage and contact with authors to identify additional sources), as well as the date the most recent search was executed. | 4 |
| Search | 8 | Present the full electronic search strategy for at least 1 database, including any limits used, such that it could be repeated. | 4, 8-9 |
| Selection of sources of evidence† | 9 | State the process for selecting sources of evidence (i.e., screening and eligibility) included in the scoping review. | 4 |
| Data charting process‡ | 10 | Describe the methods of charting data from the included sources of evidence (e.g., calibrated forms or forms that have been tested by the team before their use, and whether data charting was done independently or in duplicate) and any processes for obtaining and confirming data from investigators. | 4-5 |
| Data items | 11 | List and define all variables for which data were sought and any assumptions and simplifications made. | 4-5, 10 |
| Critical appraisal of individual sources of evidence§ | 12 | If done, provide a rationale for conducting a critical appraisal of included sources of evidence; describe the methods used and how this information was used in any data synthesis (if appropriate). | NA |
| Synthesis of results | 13 | Describe the methods of handling and summarizing the data that were charted. | 5 |
| **FUNDING** | | | |
| Funding | 14 | Describe the role of the funders of the scoping review. | 5 |

JBI = Joanna Briggs Institute; PRISMA-ScR = Preferred Reporting Items for Systematic reviews and Meta-Analyses extension for Scoping Reviews.

* Where *sources of evidence* (see second footnote) are compiled from, such as bibliographic databases, social media platforms, and Web sites.

† A more inclusive/heterogeneous term used to account for the different types of evidence or data sources (e.g., quantitative and/or qualitative research, expert opinion, and policy documents) that may be eligible in a scoping review as opposed to only studies. This is not to be confused with *information sources* (see first footnote).

‡ The frameworks by Arksey and O’Malley (6) and Levac and colleagues (7) and the JBI guidance (4, 5) refer to the process of data extraction in a scoping review as data charting*.*

§The process of systematically examining research evidence to assess its validity, results, and relevance before using it to inform a decision. This term is used for items 12 instead of "risk of bias" (which is more applicable to systematic reviews of interventions) to include and acknowledge the various sources of evidence that may be used in a scoping review (e.g., quantitative and/or qualitative research, expert opinion, and policy document).

*From:* Tricco AC, Lillie E, Zarin W, O'Brien KK, Colquhoun H, Levac D, et al. PRISMA Extension for Scoping Reviews (PRISMAScR): Checklist and Explanation. Ann Intern Med. 2018;169:467–473. [doi: 10.7326/M18-0850](http://annals.org/aim/fullarticle/2700389/prisma-extension-scoping-reviews-prisma-scr-checklist-explanation).

Appendix #2: Search strategy

**PubMed Search strategy (#1 #2 #3 #4 #5 #6)**

**Concept 1**: **Knowledge, attitudes, and perspectives.**

#1

("Knowledge"[Mesh] OR "Knowledge Management"[Mesh] OR "Knowledge Bases"[Mesh] OR "Health Knowledge, Attitudes, Practice"[Mesh] OR "Perception"[Mesh]) OR ("Attitude"[Mesh] OR "Public Opinion"[Mesh]) OR "Knowledge*"[tiab] OR "Attitude*"[tiab] OR " Practice*"[tiab] OR "Perception*"[tiab] OR "opinion*"[tiab] OR "perspective*"[tiab] OR "points of view*"[tiab] OR "view*"[tiab] OR "pathway" [tiab] OR "recommendation*" [tiab] OR "behaviour*" [tiab]

**Concept 2:** **Risk**

#2

("Risk"[Mesh] OR "Risk Assessment"[Mesh] OR "Risk Management"[Mesh] OR "Risk Factors"[Mesh] OR "Risk Evaluation and Mitigation"[Mesh]) OR "Fear"[Mesh] OR " risk*"[tiab] OR " Hazard*"[tiab] OR " Peril*"[tiab] OR " Danger*"[tiab] OR " Threat*"[tiab] OR " Menace*"[tiab] OR " Harm*"[tiab] OR "Damage*"[tiab] OR " Detriment*"[tiab] OR " Endangerment*"[tiab]OR " Downside*"[tiab] OR " Disadvantage*"[tiab] OR " fear*"[tiab] OR "consequences"[tiab] OR "risk management*"[tiab] OR " risks evaluation"[tiab]

**Concept 3:** **Mosquito**

#3

"mosquito*" [tiab]

**Concept 4:** **Gene drive mosquitos**

#4

"Transformation, Genetic"[Mesh] OR "Genetic Transformation*"[tiab] OR "gene drive*"[tiab] OR "genetically modified mosquito*"[tiab] OR "genetically modified*"[tiab] OR "transgenic mosquito*"[tiab] OR "genetic tool*"[tiab] OR "transgenic"[tiab] OR "GMM"[tiab]

**Concept 5: Malaria**

#5

"Malaria"[Mesh] OR "Mosquito Control"[Mesh] OR "Mosquito-Borne Disease*"[Mesh] OR "Mosquito Vector*"[Mesh] OR "Malaria, Falciparum"[Mesh] OR "Acute malaria"[tiab] OR "Infections, Plasmodium"[tiab] OR "malaria parasitemia"[tiab] OR " Paludism"[tiab] OR " Malaria incidenc*"[tiab] OR "Malaria*"[tiab] OR “plasmodi*”[tiab] OR "Mosquito Control"[tiab] OR "Mosquito-Borne Disease*"[tiab] OR "Mosquito Vector*"[tiab] OR "Malaria, Falciparum"[tiab]

**Concept 6:** **Africa**

#6

("Africa South of the Sahara"[Mesh] OR "South Africa"[Mesh] OR "Africa, Western"[Mesh] OR "South Africa"[Mesh] OR "Africa, Southern"[Mesh] OR "Africa, Northern"[Mesh] OR "Africa, Eastern"[Mesh] OR "Africa, Central"[Mesh]) OR "Cameroon"[Mesh] OR " Central African Republic"[Mesh] OR " Chad"[Mesh] OR " Congo"[Mesh] OR " Democratic Republic of the Congo"[Mesh] OR " Equatorial Guinea"[Mesh] OR " Gabon"[Mesh] OR " Rwanda"[Mesh] OR " Sao Tome and Principe"[Mesh] OR " Burundi"[Mesh] OR " Comoros"[Mesh] OR " Djibouti"[Mesh] OR " Eritrea"[Mesh] OR " Ethiopia"[Mesh] OR " Kenya"[Mesh] OR " Madagascar"[Mesh] OR " Seychelles"[Mesh] OR " Somalia"[Mesh] OR " South Sudan"[Mesh] OR " Sudan"[Mesh] OR " Tanzania"[Mesh] OR " Uganda"[Mesh] OR " Angola"[Mesh] OR " Botswana"[Mesh] OR " Eswatini"[Mesh] OR " Malawi"[Mesh] OR " Mozambique"[Mesh] OR " Namibia"[Mesh] OR " South Africa"[Mesh] OR " Zambia"[Mesh] OR " Zimbabwe"[Mesh] OR " Benin"[Mesh] OR " Burkina Faso"[Mesh] OR " Cote d'Ivoire"[Mesh] OR " Gambia"[Mesh] OR " Ghana"[Mesh] OR " Guinea"[Mesh] OR " Guinea-Bissau"[Mesh] OR " Liberia"[Mesh] OR " Mali"[Mesh] OR " Mauritania"[Mesh] OR " Niger"[Mesh] OR " Nigeria"[Mesh] OR " Senegal"[Mesh] OR " Sierra Leone"[Mesh] OR " Togo"[Mesh] OR "Africa"[tiab] OR "South Africa"[tiab] OR "Africa, Western"[tiab] OR "Africa, Southern"[tiab] OR "Africa, Northern"[tiab] OR "Africa, Eastern"[tiab] OR "Africa, Central"[tiab] OR "Cameroon"[tiab] OR " Central African Republic"[tiab] OR " Chad"[tiab] OR " Congo"[tiab] OR " Democratic Republic of the Congo"[tiab] OR " Equatorial Guinea"[tiab] OR " Gabon"[tiab] OR " Rwanda"[tiab] OR " Sao Tome and Principe"[tiab] OR " Burundi"[tiab] OR " Comoros"[tiab] OR " Djibouti"[tiab] OR " Eritrea"[tiab] OR " Ethiopia"[tiab] OR " Ethiopia"[tiab] OR " Kenya"[tiab] OR " Madagascar"[tiab] OR " Seychelles"[tiab] OR " Somalia"[tiab] OR " South Sudan"[tiab] OR " Sudan" [tiab] OR " Tanzania"[tiab] OR " Uganda"[tiab] OR " Angola"[tiab] OR " Botswana"[tiab] OR " Botswana"[tiab] OR " Eswatini"[tiab] OR " Malawi"[tiab] OR " Mozambique"[tiab] OR " Namibia"[tiab] OR " South Africa"[tiab] OR " Zambia"[tiab] OR " Zimbabwe"[tiab] OR " Benin"[tiab] OR " Burkina Faso"[tiab] OR " Cote d'Ivoire"[tiab] OR " Gambia"[tiab] OR " Ghana"[tiab] OR " Guinea"[tiab] OR " Guinea-Bissau"[tiab] OR " Liberia"[tiab] OR " Mali"[tiab] OR " Mauritania"[tiab] OR " Niger"[tiab] OR " Nigeria"[tiab] OR " Senegal"[tiab] OR " Sierra Leone"[tiab] OR " Togo"[tiab] OR "Cape verde" [tiab] OR " Africa"[tiab]

**#7 Combine search terms**

#1 AND #2 AND #3 AND #4 AND #5 AND #6

Appendix II: Data extraction instrument

| **Data Item** | **Description** |
| --- | --- |
| **Study Information** |  |
| Title | Full title of the study/document |
| Author(s) | First author |
| Year of Publication | Year the study was published |
| Country/Region | Country or region in Africa where the study was conducted |
| **Study Objectives** | Objectives of the study |
| **Population** |  |
| Stakeholders | Type of stakeholders involved (e.g., local communities, researchers, policymakers) |
| Sample Size | Total number of participants |
| Demographics | Key demographic details (e.g., age, gender, socioeconomic status, education level) |
| **Study Design** |  |
| Type of Study | Observational (cross-sectional, cohort, etc.), experimental, qualitative, etc. |
| Methodology | Methods used for data collection and analysis |
| Context | Geographic, cultural, or other contextual details relevant to the study |
| **Concept** |  |
| Knowledge, Perceptions, or Attitudes | Key findings on participants' knowledge, perceptions, and/or attitudes toward GMM-related risks |
| Risk Assessment | Reported concerns, benefits, or challenges related to GMMs in malaria control |
| **Outcomes** |  |
| Key Findings | Summary of main results |
| Implications | Reported or inferred implications for malaria control or policy-making |
| Limitations | Study limitations as reported by the authors or identified during data extraction |
| **Additional Details** |  |
| Notes | Additional comments or observations about the study |
